# Supplementary material for: Syncope Associated with a Congenital Variant of the Circle of Willis: Absence of the Right Anterior Cerebral Artery and Anterior Communicating Artery
Source: Research Square preprint supplement (doi:10.21203/rs.3.rs-7335489/v1), 2025-09-24
Supplement: Supplementary file 1 [file 6ed11f3fbdbcb6eb108773ee.pdf]

**Request for full Article Processing Charge (APC) waiver**

Dear Editors of *BMC Neurology*,

I am writing to express my interest in submitting our manuscript titled:

**“Syncope Associated with a Congenital Variant of the Circle of Willis: Absence of the Right Anterior Cerebral Artery and Anterior Communicating Artery”**

for publication in *BMC Neurology*.

Through this letter, I would like to formally request a **full waiver of the Article Processing Charge (APC)** due to financial constraints that prevent us from covering this cost.

Additionally, we would appreciate any information regarding institutions, organizations, or companies affiliated with the journal or the editorial process that might offer full coverage of these fees.

Our research team believes that the work presented is relevant and provides valuable information within the field of neurology, and we trust it will be of interest to the scientific community following the journal.

Thank you very much for considering this request. We remain available for any additional documentation needed to evaluate this waiver.

Sincerely,



Isabel Echevarría Frutos

Faculty of Medicine, Universidad Israel, Quito, Ecuador

Email: [jechevarria@uisrael.edu.ec](mailto:jechevarria@uisrael.edu.ec) , [gnavarro@uisrael.edu.ec](mailto:gnavarro@uisrael.edu.ec)

Phone: +593984207206
